# Supplementary material for: Structural and Biochemical Analysis of Tyrosine Phosphatase Related to Biofilm Formation A (TpbA) from the Opportunistic Pathogen Pseudomonas aeruginosa PAO1
Source: PubMed Central journal article supplement (PMC4409338; doi:10.1371/journal.pone.0124330), 2015-04-24
Supplement: pone.0124330.s001.pdf [file pone.0124330.s001.pdf]

*P. aeruginosa*

|                       |   |                                                                                                                                                                                                                                                                                                                                                                                     |
|-----------------------|---|-------------------------------------------------------------------------------------------------------------------------------------------------------------------------------------------------------------------------------------------------------------------------------------------------------------------------------------------------------------------------------------|
| <i>P. aeruginosa</i>  | 1 | MHRSP <sup>β0</sup> LAWLRLLLAA <sup>η1</sup> V.....LGAFLLG.....GPLHA.A.....ETAAT <sup>β0</sup> R <sup>η1</sup> SPA <sup>β0</sup> WA <sup>η1</sup> QAVDP..S                                                                                                                                                                                                                          |
| <i>P. fluorescens</i> | 1 | MSSIR...FIPALCLSL.....LALLAG.....PQVQA.A.....E.APS <sup>β0</sup> R <sup>η1</sup> SPD <sup>β0</sup> WA <sup>η1</sup> QPVEK..Q                                                                                                                                                                                                                                                        |
| <i>P. mendocina</i>   | 1 | MNR...FLOGRLRLASLVLFLGALLALPLSMAWAATTA.P.....VPG <sup>β0</sup> SA <sup>η1</sup> RPV <sup>β0</sup> NW <sup>η1</sup> AQPLDS..R                                                                                                                                                                                                                                                        |
| Geobacter             | 1 | MTSIT...IRPTIVACL.....IIALGAG..S <sup>β0</sup> AVGS <sup>β0</sup> AVT <sup>β0</sup> GGT <sup>β0</sup> PAA <sup>β0</sup> QPAS <sup>β0</sup> VL <sup>β0</sup> PP <sup>β0</sup> E <sup>β0</sup> RL <sup>β0</sup> SE <sup>β0</sup> TY <sup>β0</sup> ..HLPGI                                                                                                                             |
| Acinetobacter         | 1 | .....M <sup>β0</sup> KK <sup>β0</sup> TL <sup>β0</sup> F <sup>β0</sup> SP <sup>β0</sup> VL <sup>β0</sup> I <sup>β0</sup> LT <sup>β0</sup> L.....L <sup>β0</sup> SGC <sup>β0</sup> ITH <sup>β0</sup> .P.....SL <sup>β0</sup> SE <sup>β0</sup> R <sup>β0</sup> PS <sup>β0</sup> H <sup>β0</sup> GNLLHA..E                                                                             |
| Desulfococcus         | 1 | .....M <sup>β0</sup> KT <sup>β0</sup> IT <sup>β0</sup> KT <sup>β0</sup> LT <sup>β0</sup> LL <sup>β0</sup> V <sup>β0</sup> FL <sup>β0</sup> L.....S <sup>β0</sup> AAT <sup>β0</sup> L <sup>β0</sup> .Y.....A <sup>β0</sup> EE <sup>β0</sup> PR <sup>β0</sup> V <sup>β0</sup> PD <sup>β0</sup> T <sup>β0</sup> WA <sup>β0</sup> RP <sup>β0</sup> I <sup>β0</sup> INT <sup>β0</sup> DL |
| Burkholderia          | 1 | .....M <sup>β0</sup> K <sup>β0</sup> IA <sup>β0</sup> V <sup>β0</sup> IAS <sup>β0</sup> LAV <sup>β0</sup> TL.....A <sup>β0</sup> AL <sup>β0</sup> V <sup>β0</sup> .....Q <sup>β0</sup> PA <sup>β0</sup> HAD <sup>β0</sup> .P.....AS <sup>β0</sup> DA <sup>β0</sup> SA <sup>β0</sup> RP <sup>β0</sup> IK <sup>β0</sup> WA <sup>β0</sup> QSV <sup>β0</sup> VDA <sup>β0</sup> HV       |
| LKHP9428              | 1 | MLKHP..VLPALCLAL.....VSLFAN.....VSVQA..D.....AIVT <sup>β0</sup> VS <sup>β0</sup> R <sup>β0</sup> SP <sup>β0</sup> E <sup>β0</sup> WA <sup>β0</sup> QPIDA..H                                                                                                                                                                                                                         |

*P. aeruginosa*

|                       |    |                                                                                                                                                                                                                                                                                                                                                      |
|-----------------------|----|------------------------------------------------------------------------------------------------------------------------------------------------------------------------------------------------------------------------------------------------------------------------------------------------------------------------------------------------------|
| <i>P. aeruginosa</i>  | 47 | I <sup>β1</sup> N <sup>β1</sup> L <sup>β1</sup> Y <sup>β1</sup> RM <sup>β1</sup> SP <sup>β1</sup> T <sup>β1</sup> <sup>β2</sup> <sup>η2</sup> <sup>α1</sup> <sup>β3</sup> <sup>η3</sup> <sup>β4</sup> <sup>η4</sup> <sup>α2</sup> <sup>β5</sup> <sup>α3</sup> <sup>α4</sup> <sup>η5</sup> <sup>α5</sup><br>β1 β2 η2 α1 β3 η3 β4 η4 α2 β5 α3 α4 η5 α5 |
| <i>P. aeruginosa</i>  | 47 | I <sup>β1</sup> N <sup>β1</sup> L <sup>β1</sup> Y <sup>β1</sup> RM <sup>β1</sup> SP <sup>β1</sup> T <sup>β1</sup> <sup>β2</sup> <sup>η2</sup> <sup>α1</sup> <sup>β3</sup> <sup>η3</sup> <sup>β4</sup> <sup>η4</sup> <sup>α2</sup> <sup>β5</sup> <sup>α3</sup> <sup>α4</sup> <sup>η5</sup> <sup>α5</sup><br>β1 β2 η2 α1 β3 η3 β4 η4 α2 β5 α3 α4 η5 α5 |
| <i>P. fluorescens</i> | 44 | Y <sup>β1</sup> N <sup>β1</sup> L <sup>β1</sup> Y <sup>β1</sup> QMS <sup>β1</sup> PT <sup>β1</sup> <sup>β2</sup> <sup>η2</sup> <sup>α1</sup> <sup>β3</sup> <sup>η3</sup> <sup>β4</sup> <sup>η4</sup> <sup>α2</sup> <sup>β5</sup> <sup>α3</sup> <sup>α4</sup> <sup>η5</sup> <sup>α5</sup><br>β1 β2 η2 α1 β3 η3 β4 η4 α2 β5 α3 α4 η5 α5                |
| <i>P. mendocina</i>   | 55 | I <sup>β1</sup> N <sup>β1</sup> L <sup>β1</sup> Y <sup>β1</sup> RM <sup>β1</sup> PT <sup>β1</sup> <sup>β2</sup> <sup>η2</sup> <sup>α1</sup> <sup>β3</sup> <sup>η3</sup> <sup>β4</sup> <sup>η4</sup> <sup>α2</sup> <sup>β5</sup> <sup>α3</sup> <sup>α4</sup> <sup>η5</sup> <sup>α5</sup><br>β1 β2 η2 α1 β3 η3 β4 η4 α2 β5 α3 α4 η5 α5                 |
| Geobacter             | 60 | G <sup>β1</sup> NG <sup>β1</sup> SR <sup>β1</sup> VAP <sup>β1</sup> <sup>β2</sup> <sup>η2</sup> <sup>α1</sup> <sup>β3</sup> <sup>η3</sup> <sup>β4</sup> <sup>η4</sup> <sup>α2</sup> <sup>β5</sup> <sup>α3</sup> <sup>α4</sup> <sup>η5</sup> <sup>α5</sup><br>β1 β2 η2 α1 β3 η3 β4 η4 α2 β5 α3 α4 η5 α5                                               |
| Acinetobacter         | 42 | H <sup>β1</sup> NF <sup>β1</sup> Y <sup>β1</sup> K <sup>β1</sup> IS <sup>β1</sup> <sup>β2</sup> <sup>η2</sup> <sup>α1</sup> <sup>β3</sup> <sup>η3</sup> <sup>β4</sup> <sup>η4</sup> <sup>α2</sup> <sup>β5</sup> <sup>α3</sup> <sup>α4</sup> <sup>η5</sup> <sup>α5</sup><br>β1 β2 η2 α1 β3 η3 β4 η4 α2 β5 α3 α4 η5 α5                                 |
| Desulfococcus         | 43 | K <sup>β1</sup> H <sup>β1</sup> NR <sup>β1</sup> HR <sup>β1</sup> <sup>β2</sup> <sup>η2</sup> <sup>α1</sup> <sup>β3</sup> <sup>η3</sup> <sup>β4</sup> <sup>η4</sup> <sup>α2</sup> <sup>β5</sup> <sup>α3</sup> <sup>α4</sup> <sup>η5</sup> <sup>α5</sup><br>β1 β2 η2 α1 β3 η3 β4 η4 α2 β5 α3 α4 η5 α5                                                 |
| Burkholderia          | 45 | N <sup>β1</sup> N <sup>β1</sup> L <sup>β1</sup> HR <sup>β1</sup> IT <sup>β1</sup> <sup>β2</sup> <sup>η2</sup> <sup>α1</sup> <sup>β3</sup> <sup>η3</sup> <sup>β4</sup> <sup>η4</sup> <sup>α2</sup> <sup>β5</sup> <sup>α3</sup> <sup>α4</sup> <sup>η5</sup> <sup>α5</sup><br>β1 β2 η2 α1 β3 η3 β4 η4 α2 β5 α3 α4 η5 α5                                 |
| LKHP9428              | 45 | Y <sup>β1</sup> N <sup>β1</sup> L <sup>β1</sup> H <sup>β1</sup> QMT <sup>β1</sup> <sup>β2</sup> <sup>η2</sup> <sup>α1</sup> <sup>β3</sup> <sup>η3</sup> <sup>β4</sup> <sup>η4</sup> <sup>α2</sup> <sup>β5</sup> <sup>α3</sup> <sup>α4</sup> <sup>η5</sup> <sup>α5</sup><br>β1 β2 η2 α1 β3 η3 β4 η4 α2 β5 α3 α4 η5 α5                                 |

variable insert

general acid loop

*P. aeruginosa*

|                       |     |                                                                                                                                                                                                                                 |
|-----------------------|-----|---------------------------------------------------------------------------------------------------------------------------------------------------------------------------------------------------------------------------------|
| <i>P. aeruginosa</i>  | 116 | L <sup>α2</sup> R <sup>α2</sup> Q <sup>α2</sup> L <sup>α2</sup> Q <sup>α2</sup> A <sup>α2</sup> ER <sup>β5</sup> EG <sup>β5</sup> <sup>α3</sup> <sup>α4</sup> <sup>η5</sup> <sup>α5</sup><br>α2 β5 α3 α4 η5 α5                  |
| <i>P. aeruginosa</i>  | 113 | L <sup>α2</sup> R <sup>α2</sup> AI <sup>α2</sup> Q <sup>α2</sup> SA <sup>α2</sup> E <sup>α2</sup> A <sup>α2</sup> CG <sup>β5</sup> <sup>α3</sup> <sup>α4</sup> <sup>η5</sup> <sup>α5</sup><br>α2 β5 α3 α4 η5 α5                 |
| <i>P. fluorescens</i> | 124 | L <sup>α2</sup> RS <sup>α2</sup> IR <sup>α2</sup> O <sup>α2</sup> A <sup>α2</sup> Q <sup>α2</sup> S <sup>α2</sup> R <sup>α2</sup> GR <sup>β5</sup> <sup>α3</sup> <sup>α4</sup> <sup>η5</sup> <sup>α5</sup><br>α2 β5 α3 α4 η5 α5 |
| <i>P. mendocina</i>   | 130 | V <sup>α2</sup> V <sup>α2</sup> VL <sup>α2</sup> M <sup>α2</sup> AD <sup>α2</sup> PAN <sup>α2</sup> Q <sup>α2</sup> VP <sup>β5</sup> <sup>α3</sup> <sup>α4</sup> <sup>η5</sup> <sup>α5</sup><br>α2 β5 α3 α4 η5 α5               |
| Geobacter             | 113 | M <sup>α2</sup> Q <sup>α2</sup> Q <sup>α2</sup> I <sup>α2</sup> TA <sup>α2</sup> K <sup>α2</sup> Q <sup>α2</sup> NH <sup>α2</sup> <sup>β5</sup> <sup>α3</sup> <sup>α4</sup> <sup>η5</sup> <sup>α5</sup><br>α2 β5 α3 α4 η5 α5    |
| Acinetobacter         | 112 | K <sup>α2</sup> TI <sup>α2</sup> IN <sup>α2</sup> .DA <sup>α2</sup> K <sup>α2</sup> GP <sup>β5</sup> <sup>α3</sup> <sup>α4</sup> <sup>η5</sup> <sup>α5</sup><br>α2 β5 α3 α4 η5 α5                                               |
| Desulfococcus         | 115 | L <sup>α2</sup> K <sup>α2</sup> AL <sup>α2</sup> RI <sup>α2</sup> AD <sup>α2</sup> Q <sup>α2</sup> D <sup>α2</sup> GP <sup>β5</sup> <sup>α3</sup> <sup>α4</sup> <sup>η5</sup> <sup>α5</sup><br>α2 β5 α3 α4 η5 α5                |
| Burkholderia          | 115 | L <sup>α2</sup> K <sup>α2</sup> AL <sup>α2</sup> RI <sup>α2</sup> AD <sup>α2</sup> Q <sup>α2</sup> D <sup>α2</sup> GP <sup>β5</sup> <sup>α3</sup> <sup>α4</sup> <sup>η5</sup> <sup>α5</sup><br>α2 β5 α3 α4 η5 α5                |
| LKHP9428              | 114 | L <sup>α2</sup> RA <sup>α2</sup> IR <sup>α2</sup> O <sup>α2</sup> A <sup>α2</sup> E <sup>α2</sup> A <sup>α2</sup> NG <sup>β5</sup> <sup>α3</sup> <sup>α4</sup> <sup>η5</sup> <sup>α5</sup><br>α2 β5 α3 α4 η5 α5                 |

PTP loop

α4-α5 loop

*P. aeruginosa*

|                       |     |                                                                                                                                                                                                                                                                                                       |
|-----------------------|-----|-------------------------------------------------------------------------------------------------------------------------------------------------------------------------------------------------------------------------------------------------------------------------------------------------------|
| <i>P. aeruginosa</i>  | 185 | VDGL <sup>α6</sup> R <sup>α6</sup> LAMANG <sup>α6</sup> ECSP <sup>α6</sup> SR <sup>α6</sup> FAV <sup>α6</sup> CHV <sup>α6</sup> RE <sup>α6</sup> WMA <sup>α6</sup> QALDRP...                                                                                                                          |
| <i>P. fluorescens</i> | 182 | VDKLR <sup>α6</sup> TALANG <sup>α6</sup> DCST <sup>α6</sup> SV <sup>α6</sup> FAT <sup>α6</sup> CS <sup>α6</sup> VK <sup>α6</sup> SW <sup>α6</sup> FET <sup>α6</sup> VS <sup>α6</sup> GAT <sup>α6</sup> KPLSN                                                                                          |
| <i>P. mendocina</i>   | 193 | IP <sup>α6</sup> TL <sup>α6</sup> RSALANG <sup>α6</sup> AC <sup>α6</sup> ST <sup>α6</sup> SP <sup>α6</sup> WAL <sup>α6</sup> CALK <sup>α6</sup> KDRLLGS <sup>α6</sup> VEGA...                                                                                                                         |
| Geobacter             | 197 | EQLP <sup>α6</sup> K <sup>α6</sup> R.....                                                                                                                                                                                                                                                             |
| Acinetobacter         | 183 | IK <sup>α6</sup> WIR <sup>α6</sup> EQL <sup>α6</sup> SN <sup>α6</sup> PS.....                                                                                                                                                                                                                         |
| Desulfococcus         | 179 | VEQ <sup>α6</sup> VR <sup>α6</sup> RDAG <sup>α6</sup> L <sup>α6</sup> PAR <sup>α6</sup> .....                                                                                                                                                                                                         |
| Burkholderia          | 184 | VER <sup>α6</sup> LR <sup>α6</sup> Q <sup>α6</sup> AV <sup>α6</sup> NN <sup>α6</sup> G.....                                                                                                                                                                                                           |
| LKHP9428              | 183 | ID <sup>α6</sup> KL <sup>α6</sup> R <sup>α6</sup> TALAT <sup>α6</sup> GDC <sup>α6</sup> ST <sup>α6</sup> S <sup>α6</sup> AFAL <sup>α6</sup> CS <sup>α6</sup> MK <sup>α6</sup> Q <sup>α6</sup> W <sup>α6</sup> IST <sup>α6</sup> T <sup>α6</sup> G <sup>α6</sup> SE <sup>α6</sup> Q <sup>α6</sup> KE.. |
